# Supplementary material for: Adjoint-Based Simultaneous State and Parameter Estimation in an Arctic Sea Ice-Ocean Model using MITgcm (c63m)
Source: Copernicus journal article supplement (doi:10.5194/gmd-2024-189), 2025-04-30
Supplement: Supplementary file [file gmd-2024-189-AC3-supplement.pdf]

## **Response to the reviewers' comments on "Adjoint-Based Simultaneous State and Parameter Estimation in an Arctic Sea Ice-Ocean Model using MITgcm (c63m)"**

Guokun Lyu et al.

This study potentially contributes significantly to the sea ice model optimisation problem by employing an adjoint method that, for the first time, simultaneously optimises both the model state and a set of its parameters. Therefore, the study topic is valuable and suitable for GMD, so its publication after a careful revision is recommended.

We thank the reviewers for their careful reading of the manuscript, their corrections of typos and grammatical issues, and their valuable suggestions for improving the work. We have revised the manuscript in accordance with the reviewers' comments. Below, we respond to the reviewers' questions and suggestions, with key points highlighted in red.

[1] A major issue is that the study is based on the very exceptional year 2011/2012 in the Arctic. However, the authors make general claims about the physical importance of sea ice model parameters. A question arises: Is one year enough to reach such conclusions, and are the results robust when tested for other years?

Response:

There are two reasons why we chose the year 2012 as our test base. Firstly, the seasonal evolution of sea ice concentration (SIC) errors represents the general pattern **of SIC errors in other years and across other Arctic ocean and sea ice reanalysis datasets**. As shown in Figure R1 and Figure 4 (in the manuscript), SIC errors increase and reach a peak in June; they then decrease slowly until September, followed by a rapid increase in October. A one-year assimilation window is sufficient to test whether the joint optimization of parameters and state can reduce seasonal SIC errors. Secondly, the sea ice retreat processes in 2012 have been extensively studied, which facilitates the validation of our assimilation results.

The assimilation results reveal that optimizing sea ice parameters improves the sea ice growth process in October. The optimization reduces the leads closing parameter  $H_0$ , which decreases the amount of latent heat required for the initial formation of sea ice. This leads to faster formation of thinner sea ice over open water (Figure 5 and Lines 291–303). The delayed sea ice recovery process occurs not only in 2012 but also in other years and across other Arctic ocean-sea ice assimilation models, as evidenced by the drastic increase in SIC errors during October in Figure R1. Therefore, we emphasize the importance of optimizing the lead closing parameter  $H_0$ . Moreover,  $H_0$  is widely used in state-of-the-art sea ice modules and ocean-sea ice assimilation systems. Our

results indicate that optimizing such parameters is necessary to improve the accuracy of model simulations and forecasts. We have also added a discussion in Lines 472–475 regarding broader research implications in sea ice forecast and reanalysis.

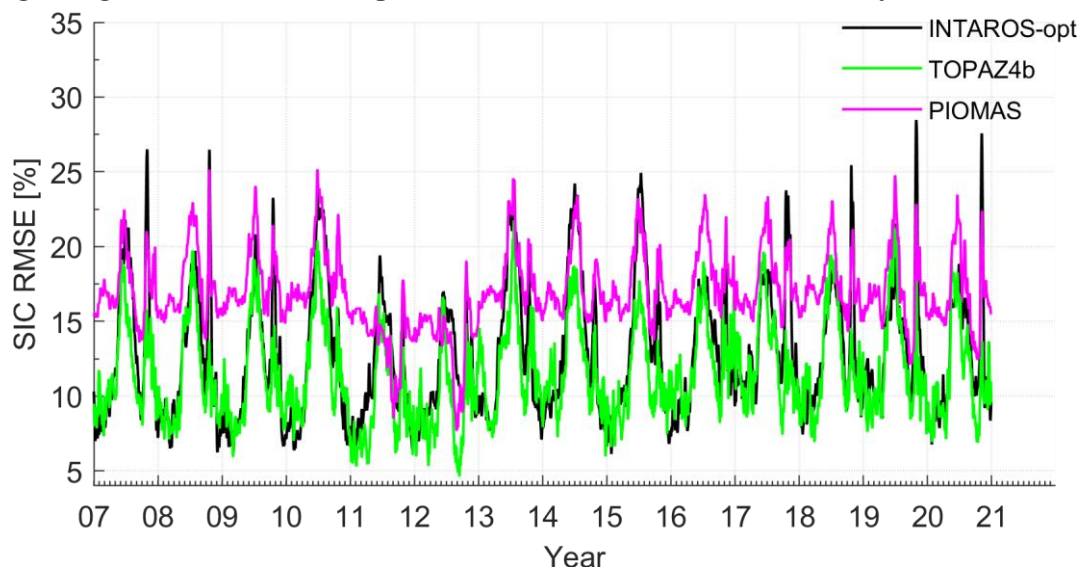

Figure R1. Root mean square errors of sea ice concentration between satellite observations and INTAROS-opt (black line, Lyu et al., 2021), TOPAZ4b (green line), and PIOMAS (magenta line).

[2] There is an issue of reproducibility, as the adjoint model is only available to the editors and reviewers for review via the submission system, and the study may not comply with the FAIR principles (<https://www.nature.com/articles/sdata201618>).

Response:

We thank the reviewer for their comment. Prior to the review and discussion process, we had discussed this issue with the chief editor several times.

1) In this study, **we only modified the MITgcm (63m) model which we have published here** (<https://doi.org/10.5281/zenodo.14584780> (Lyu, 2025))! With these MITgcm codes and data, anyone can reproduce the final results in the manuscript. So, in this sense, we have already meet the “Code and Data Policy” of GMD.

2) For the adjoint model of MITgcm, we and the MITgcm-ECCO communities didn’t try to write them manually. This is different with the other modelling systems with adjoint (such as ROMS, WRF, etc.). MITgcm has been adapted for use with the TAF (Transformation of Algorithms in Fortran) to perform ocean state estimation and assimilation. Therefore, if you want to do assimilation with MITgcm, you need a TAF license, since “we (the TAF users) are not allowed pass the right of usage to any third party”.

Following the Code and Data Policy of GMD, **we state clearly that: “We note that a commercial TAF license is required to fully reproduce the optimization steps described in this study.”** in the “Code and Data Availability Statement”.

Below is the Code and Data Policy of GMD: “where the authors cannot, for reasons beyond their control, publicly archive part or all of the code and data associated with a paper, they must clearly state the restrictions. They must also provide confidential access to the code and data for the editor and reviewers in order to enable peer review. The arrangements for this access must not compromise the anonymity of the reviewers.

[3] The discussion section is very brief, and what is crucially missing from it is comparing the study results with others, which would importantly put them in the context of broader research. Such a comparison would also help assess the results' robustness and novelty. Also, English is poor in places, with many writing mistakes and misspelled words. There is a need to check English grammar.

Response:

We appreciate the reviewer's comments here. Comparing different model simulations and reanalysis datasets is always valuable. We have attempted to compare our initial version of the Arctic ocean-sea ice reanalysis with TOPAZ4, PIOMAS, and ECCO. Recently, we identified issues with the seasonal evolution of SIC errors (Figure R1). To address this problem, we developed a simultaneous state and parameter estimation scheme. Our results indicate that optimizing parameters alongside initial conditions improved the SIC growth process in the Pacific sector of the Arctic Ocean during October. Notably, all other Arctic ocean-sea ice reanalysis datasets exhibit similar issues. Therefore, our findings encourage other assimilation systems to incorporate parameter estimation schemes into their assimilation frameworks.

Since this paper focuses on developing and testing the method, we only conducted a one-year assimilation experiment and compared the results with our own baseline assimilation outputs. We plan to run the assimilation system over the period 1979–2024 to produce a new Arctic ocean-sea ice dataset. Subsequently, extensive comparisons will be performed with other global and Arctic ocean-sea ice reanalysis products (e.g., Uotila et al., 2019).

Moreover, we have checked the English grammar carefully and revised the Conclusion and Discussion part.

Finally, I have multiple minor points and editorial suggestions that I hope the authors will consider:

[4] line 18: tuned

Response: we have corrected the typos.

[5] line 28: The end of Abstract mentions new Arctic reanalysis, but the manuscript does not provide any substantial information on that. I suggest you add such information, or delete the mention from Abstract.

Response:

We appreciate this comment. Our purpose in developing this system is to produce a new Arctic ocean-sea ice reanalysis dataset. This also represents the overall implication of this study and the system. We believe it is better to retain these words here.

[5] Introduction is missing to cite the relevant-looking paper by Xiying Liu and Lujun Zhang "Study on Optimization of Sea Ice Concentration with Adjoint Method," Journal of Coastal Research 84(sp1), 44-50, (1 June 2018). <https://doi.org/10.2112/SI84-006.1> as they optimised MITgcm initial conditions. I suggest you add the citation.

Response: We have added the reference in Line 86.

[6] In introduction machine learning studies are mentioned. A potentially relevant study by Nie Y, Li C, Vancoppenolle M, et al (2023) Sensitivity of NEMO4.0-SI3 model parameters on sea ice budgets in the Southern Ocean. Geoscientific Model Development 16:1395–1425. <https://doi.org/10.5194/gmd-16-1395-2023>, is missing. I suggest considering adding it.

Response: We have cited this reference in Line 48.

[7] line 72: What are 'intermediate coupled models'? Do you mean intermediate complexity. Seems a word is missing here.

Response: Yes, we mean “coupled climate models of intermediate complexity”. We have revised the words in Lines 82-83.

[8] line 98: 'z-levels ranging', again a word seems missing here. Do you mean z-level thicknesses?

Response: We thank the reviewer for pointing out the writing error. We have revised it to: "We have 50 z-levels **with layer thickness** ranging from 10 m at the surface to 456 m in the deep ocean."

[9] lines 108-114: This paragraph is hard to grasp. Could you clarify it e.g. by adding a sketch or a diagram illustrating a simple example?

Response:

Equation (1) is a general form of the cost function in variational assimilation. The first term on the right-hand side is easily understood: it represents the square of the model-data difference normalized by observational uncertainties. For simplicity, and using the parameter  $H_0$  as an example, the second term on the right can be written as:  $\frac{\Delta H_0^2}{\sigma^2}$ .  $\Delta H_0$  is the increment of the parameter  $H_0$ .  $\sigma$  denotes the prior uncertainty of  $H_0$ , which is set to  $\sigma=0.2 \times H_0$ . This term increases with larger  $\Delta H_0$  and thus limits the magnitude of adjustments to the parameters. Additionally, since the number of observations is less than the number of control variables, this term helps provide background information to prevent the optimization process from being underdetermined. Therefore, we state “ensures that complete information on the control variables is available” in Line 118.

We have attempted to clarify Equation (1) in a simplified manner but have not yet found a better approach. We hope the reviewer will understand it with the above explanation.

[10] Table 1 lists the parameters selected for optimisation. Why these parameters were selected has not been explained.

Response:

The 13 sea ice parameters were chosen based on [a previous study by Sumata et al. \(2019\) \(which used a similar sea ice module\) and our prior sensitivity experiments](#). We have added the following sentence: “Based on a previous study with a similar sea ice module (Sumata et al., 2019) and our sensitivity experiments, we identify these 13 sea ice parameters, which have a considerable impact on sea ice properties” (Lines 136–138).

[11] line 165 and possibly elsewhere: Numbers and units have a space between them. '48h' -> '48 h'.

Response: We thank the reviewer for pointing out the errors. We have revised them throughout the manuscript.

[12] Table 2. The first column lists observational variables. Would be useful to explain in the caption what these acronyms mean. They are in text but caption seems more appropriate. In general, table and figure captions are quite brief and do not explain the figure and table contents very well.

Response: We thank the reviewer for their suggestions. We have added explanations for these acronyms below Table 2. For other tables and figures (Figures 1, 2, and 5) containing acronyms, we have also included explanations.

[13] line 171: 'include' -> 'includes'

Response: Agree, we have corrected this mistake.

[14] line 182: Does 'long measurement' mean long measurement period? It is not sure whether the IMB deployments on thick ice ensure the spatial representativeness, if the surrounding ice is thinner.

Response: The “long measurement” should be “long measurement period”, we have corrected it in Line 218.

There appears to be a misunderstanding regarding the statement: “The IMBs are deployed on thick and level ice floes to achieve a relatively long measurement period and ensure the spatial representativeness of observations.” **Our intended meaning is that if IMBs drift over an extended period and distance, they can measure sea ice thickness (SIT) across a larger area, thereby achieving better spatial representation. Based on the reviewer’s comment, “spatial representativeness” refers to how effectively a point SIT observation can represent SIT in its surrounding areas.** To clarify this misunderstanding, we have deleted the phrase “ensure the spatial representativeness of observations.”

[15] line 184: perhaps delete word 'fully'.

Response: We have deleted the word “fully”.

[16] line 219: 'parameters' -> 'parameter'

Response: Agree, and we have corrected this typo.

[17] line 219: 'H0and evaluate' -> 'H0 and evaluate'

Response: We agree and have inserted a space here.

[18] lines 221-222: Are equations (2) and (3) representing a tangent linear model?

Response:

Equations (2)–(3) are not the tangent linear model itself, but rather schematic equations of a Taylor expansion. Using these equations (2)–(3), we can evaluate the linearity and nonlinearity of the coupled ocean-sea ice system through three forward

model runs. Within equations (2)–(3),  $\frac{\partial M}{\partial H}$  can be interpreted as a tangent linear model. For assimilation applications, we developed the tangent linear model and its adjoint based on the discrete forward model, which is a complex and time-consuming process.

[19] line 231: Why does the model not reproduce positive SIC changes well?

Response:

The key point of Figure 2 is that the tangent linear model (TLM) can represent the size and pattern of SIC errors caused by parameter uncertainties of considerable magnitude.

It is unclear why the TLM does not show any positive SIC changes. Several reasons may account for the failure to reproduce the positive SIC changes. Firstly, estimating the linear component using Taylor expansion requires the perturbation to be very small (e.g.,  $10^{-16} \sim 10^{-6}$ , depending on nonlinearity of the model and integration time), but 10% perturbations on  $H_0$  are large. In this case, the estimated linear component may not be accurate. Secondly, the tangent linear approximation of the nonlinear model and modifications to the TLM likely simplify some processes.

[20] line 278: Could you justify why October is important for Arctic sea ice?

Response:

October marks the refreezing period in the Arctic Ocean. A delayed refreezing process leads to thinner sea ice in subsequent years, creating a trend of increasingly thinner ice. Concurrently, more oceanic heat is released into the atmosphere, resulting in prolonged impacts on Northern Hemisphere weather patterns.

We have added the following sentence: "Since the sea ice recovery process has significant impacts on ocean-ice-atmosphere fluxes and sea ice thickness in subsequent years, we now focus on the SIC improvements during October" (Lines 292–293).

[21] line 280: 'most prounced over the Arctic Ocean.' -> 'most pronounced.'

Response: Agree, we have corrected the typo.

[22] Figure 5: What are red and green lines in panels (a), (b) and (c). You should explain them in the caption. What is the year in (d). Is it 2012? You should either add it to the caption or figure labels.

Response:

We thank the reviewer for their comments here. The green lines in Figures 5(a)–(c) indicate the sea ice edge (15% SIC) in the control run, and the red lines represent the

corresponding sea ice edge from satellite observations (Figure 5a), opti-SE (Figure 5b), and opti-SPE (Figure 5c). Since these lines were not mentioned in the text, we have removed them from Figure 5. In panel (d), we have added "2012" to the x-axis label.

[23] line 291: 'and this ocean heat'

Response: Agree, we have corrected the mistake.

[24] line 293: 'less ocean heat is released'

Response: Agree, we have corrected the mistake.

[25] line 294: 'water areas freeze'

Response: Agree, we have corrected the mistake.

[26] line 296: 'improve the SIC evolution'

Response: Agree, we have corrected the mistake.

[27] line 298: Did you look at how much the ocean heat varies between the simulations?

Response: We have not checked the ocean heat differences among the three simulations. The issue is that, with a one-year assimilation, adjustments to the initial temperature have a much greater impact on ocean heat changes than on sea ice. Once we complete our new reanalysis, it will likely be more insightful to compare ocean-ice-atmosphere heat fluxes across different reanalysis datasets.

[28] Figure 6: (b) Add the year (2012) in question.

Response: We thank the reviewer for their comment and have added "2012" to the x-axis label.

[29] line 314: broke off

Response: We agree and have corrected it.

[30] line 319: ocean starts to freeze

Response: We agree and have revised it.

[31] Figure 7: Add the year (2012) in question.

Response: We have added the year 2012 to x-axis label.



[32] line 329: SIC and SIC observations.

Response: Here, it should be "SIC and SIT observations". The left panels display satellite-derived SIC at the three mooring locations, with the shadings representing satellite SIC uncertainties. The right panels show SIT and their corresponding uncertainties.

[33] line 335: explain symbols N and n in the formula.

Response: We have added the following statement in Lines 396–397: 'N is the total number of valid SIT observations from an IMB, and n represents the observation number.

[34] line 337-338: 'with long records'

Response: We agree and has corrected the error.

[35] line 339: Are these IMBs still functional?

Response: These IMBs were deployed over 14 years ago, and none of them are operational anymore. In fact, new IMBs are deployed annually by CRREL (<http://imb-crrel-dartmouth.org/results/>), AWI, our group (PRIC), and others.

[36] Figure 8: Wouldn't it make more sense to calculate the statistics (mean and CRMSD) against CS-SMOS instead of IMBs. You seem to treat CS-SMOS as a reference.

Response: We thank the reviewer for their comment. The CS2SMOS SIT data are assimilated into the model and thus are not independent observations, whereas IMBs are independent observations. We compare the simulations against CS2SMOS data to assess whether the new algorithm can bring the model simulations closer to the assimilated observations. The comparison against IMBs is intended to validate the three model simulations. Additionally, we cross-validate the CS2SMOS data because this dataset does not consist of direct SIT measurements and may have certain unknown issues.

[37] line 347: Where do the 0.2-0.7 m SIT biases appear? Not in Figure 8.

Response:

In Figures 8a–f, we have listed the mean SIT at the bottom of each panel (marked as “Mean”). For example, in Figure 8a, the mean bias between the control run and CS2SMOS data is  $1.85 - 1.42 = 0.43$  m.

When directly plotting the evolution of SIT, there are consistent vertical shifts between different lines. In such cases, the only signal visible is these biases. If we

remove these biases—for example, by adding an offset to the model results and CS2SMOS data—we can further compare the sea ice growth processes along their drifting trajectories. This is precisely what we try to illustrate in Figure 8.

[38] line 348: It is not clear that opti-SPE is closer to CS2SMOS than other simulations.

Response:

Here, we mean that the "Mean" SIT (see the mean value at the bottom of each panel) in opti-SPE is closer to that of CS2SMOS in Figures 8c–f. opti-SPE has reduced the mean SIT biases in these cases.

We have listed the mean SIT and plotted the SIT without offsets for two purposes: 1) to examine whether the state and parameter estimation algorithm can push the model further closer to the assimilated observations, as indicated by the "Mean" SIT; 2) to examine the SIT evolution in IMBs, model simulations, and CS2SMOS data.

[39] line 351: '... IMB measurements usually show 0.5-1.5 m differences compared ...'

Response: We agree and we have corrected it.

[40] line 355: Although IMB buoys are deployed on thick level ice, pressure ridges increase the areal average thickness of drift ice. Would this also increase CS2SMOs SIT?

Response: That is definitely a potential cause, which we have included in Line 357: "Ice dynamic deformation can also contribute to the thickening of sea ice within the grid." However, due to the relative low resolution and over-smooth, CS2SMOS SIT may not measure the pressure ridge efficiently.

[41] line 368: 'drifting periods longer than'

Response: Agree and we have corrected it.

[42] Figure 9: Are these trajectories from Jan-Dec 2012?

Response:

Not all trajectories cover the period from January to December 2012. From the IABP dataset, we selected GPS trajectories recorded in 2012 with a duration of more than 100 days. In polar regions, most in-situ equipment is deployed between August and September. Some of this equipment may malfunction due to harsh environmental conditions, while others may drift out of the Fram Strait along with the ice.

Consequently, year-round Arctic observations are always scarce and valuable, and we have made every effort to utilize these data fully.

[43] line 381: 'the drifting buoys do not differ systematically.'

Response: Agree, we have corrected it following the reviewer's suggestion.

[44] line 383: 'the region with gradually decreasing SIC'

Response: Agree, we have corrected following the reviewer's suggestion.

[45] line 392: buoys 16 and 21 do not show reduction from CTRL to opti-SPE. Choose the buoys that do so, instead.

Response: We thank the reviewer for their comment here. The statistics in Figures 9b and 9c already show that the three simulations match the buoys well, with several exceptions (NOs 15-22). We have attempted to identify why data assimilation reduces the model performance, and we use buoys 16 and 21 to explain the reasons for this poor performance. The problem is that when the sea ice moves toward the ice-free regions, the model simulations and the satellite fails to simulate/observe the ice floe on which the buoys are deployed. Then the ice velocity doesn't match.

[46] line 399: Common understanding is that the MIZ starts when SIC is around 85% and the internal ice stress becomes unimportant.

Response: We thank the reviewer for their comment and have incorporated this common understanding in Lines 469–470.

[47] line 401: '(Figure 10b-d)'

Response: We thank the reviewer for pointing out this issue, and we have revised it to (Figure 10b,d) in Line 441.

[48] line 402: I do not understand this claim related to reproduction of the weakening ice field. In contrast, ice physics simulation becomes easier when the internal ice stress is reduced and ice drift becomes free. The RMSE could increase only due to faster SIV which is also more variable.

Response: It is true that simulating ice physics becomes easier when internal ice stress is reduced and ice drift is unconstrained. However, the issue is that sea ice models struggle to simulate SIC and SIT in regions with small ice coverage (e.g, Figure 10b, d). If ice floes are too small to be detected by either model simulations or satellite sensors, the sea ice velocity derived from GPS trajectories will not align with model simulations or satellite data. This is why we state, "It is not possible for the three model

simulations to perfectly reproduce the weakening ice field given current sea ice model physics."

[49] lines 408-409: Note that you use continuum ice model that can not capture individual ice floes.

Response: That is correct. This represents the key challenge when comparing ice-based observations with model simulations, particularly near the ice edge.

[50] line 411: 'the marginal ice zone'.

Response: We agree and we have corrected it.

[51] Figure 10: Is buoy 16 on the left and 21 on the right? Add relevant information in the figure caption.

Response: We thank the reviewer for their suggestion. We have replotted Figure 10, with buoy information included in the title, and have added "2012" to the x-axis.

[52] lines 415-452: English is very bad in this section. I suggest revising and rewriting entirely.

Response: We thank the reviewer for their suggestion and have revised this part.

[53] line 416: 'In a coupled sea ice-ocean model' and 'schemes describe'

[54] line 417: 'parameters are major sources'

[55] lines 417-419: This aspect was not addressed in the study, so the last sentence of this paragraph should be removed, or moved to Introduction with proper literature citations added.

[56] line 420: 'estimate the optimal model state and parameter values'

[57] line 425: 'simultaneous'

[58] line 426: 'traditional'

Response: we have rewrite the part related to comments [53]-[58].

[59] line 429: Note that sea ice does not grow laterally. There could be frazil ice growth that once buoyant enough starts to float on sea surface. Is that what you mean?

Response: We thank the reviewer for their suggestion. In the numerical model, frazil ice growth is parameterized using  $H_0$ . Reducing  $H_0$  increases frazil ice growth. We have deleted the word "lateral" in Line 475.

[60] line 433: 'the simulated SIT in agreement with CS2CMOS SIT taking into account its prior uncertainties.'

Response: We thank the reviewer for their suggestion and have revised this in Lines 477–478.

[61] line 438: 'However, '

Response: We agree and have corrected the typo.

[62] line 447: 'brought into agreement' and 'efficiently, and also with independent'

Response: Agree, and we have corrected the typo.

[63] line 448: 'Zampieri et al. (2021) demonstrated '

Response: Agree, and we have deleted “also” as the reviewer suggested.

[64] line 450: 'Therefore, sea ice model remains a suitable tool for the Arctic Ocean'

Response: Agree, and we have corrected it.

[65] lines 450-451: 'studies. However, we will update'

Response: Agree, and we have corrected it.

[66] line 451: Is it computationally significantly more expensive to run the more complex CICE? Have you considered this aspect?

Response: We have begun updating the sea ice module with the more complex CICE model. At the current stage, computational cost does not appear to be a major challenge. However, we require time to develop the adjoint model of CICE and verify its accuracy, as we did for the results presented in Figure 2.

[67] lines 451-452: 'next state to reconstruct'

Response: We thank the reviewer for pointing out this typo. The correct wording should be: "We will update the sea ice module with the more complex CICE model in the next

stage and reconstruct changes in the Arctic Ocean and sea ice using SPE.". This is the primary objective behind our development of the assimilation system.

[68] line 466: 'University of Washington'

Response: Agree, and we have corrected the typo.
